# Supplementary material for: Luminescent enhancement study of 3Tb,5Ce,5Li:CaF2: effect of Li+ ion concentration and hyperthermia applications of 3Tb:CaF2/Fe3O4 nanocomposite
Source: Royal Society of Chemistry journal article supplement (doi:10.1039/c8nj04057e), 2018-12-18
Supplement: c8nj04057e1.pdf [file c8nj04057e1.pdf]

## Electronic Supplementary Material (ESI) for New Journal of Chemistry

### **Luminescent enhancement study of 3Tb,5Ce,5Li:CaF<sub>2</sub> : effect of Li<sup>+</sup> ions concentrations and hyperthermia applications of 3Tb:CaF<sub>2</sub>/Fe<sub>3</sub>O<sub>4</sub> nanocomposite.**

Ningthoujam Premananda Singh<sup>a</sup>, Nandini Kumam<sup>a</sup>, Laishram Priyobarta Singh<sup>b</sup>,  
Nongmaithem Rajmuhon<sup>a\*</sup> and Sri Krishna Srivastava<sup>a,c\*</sup>

<sup>a</sup>*Department of Chemistry, Manipur University, Imphal-795003, India*

<sup>b</sup>*National Institute of Technology, Langol-795004, India*

<sup>c</sup>*Vice-Chancellor, North-Eastern Hill University, Shillong, Meghalaya-793022, India*

**Table SI 1.** Peaks related to FTIR spectra of 3Tb:CaF<sub>2</sub> nanoparticles prepared at 150 °C using ethylene glycol as capping agent and solvent medium.

| Sl. No. | Peaks (cm-1) | Vibrational                |
|---------|--------------|----------------------------|
| 1       | 3408         | O-H stretching             |
| 2       | 1641         | O-H bending                |
| 3       | 1350-1450    | C-O                        |
| 4       | 700-1200     | CH <sub>2</sub> bending    |
| 5       | 2900         | Asymmetric CH <sub>2</sub> |
| 6       | 2860         | symmetric CH <sub>2</sub>  |

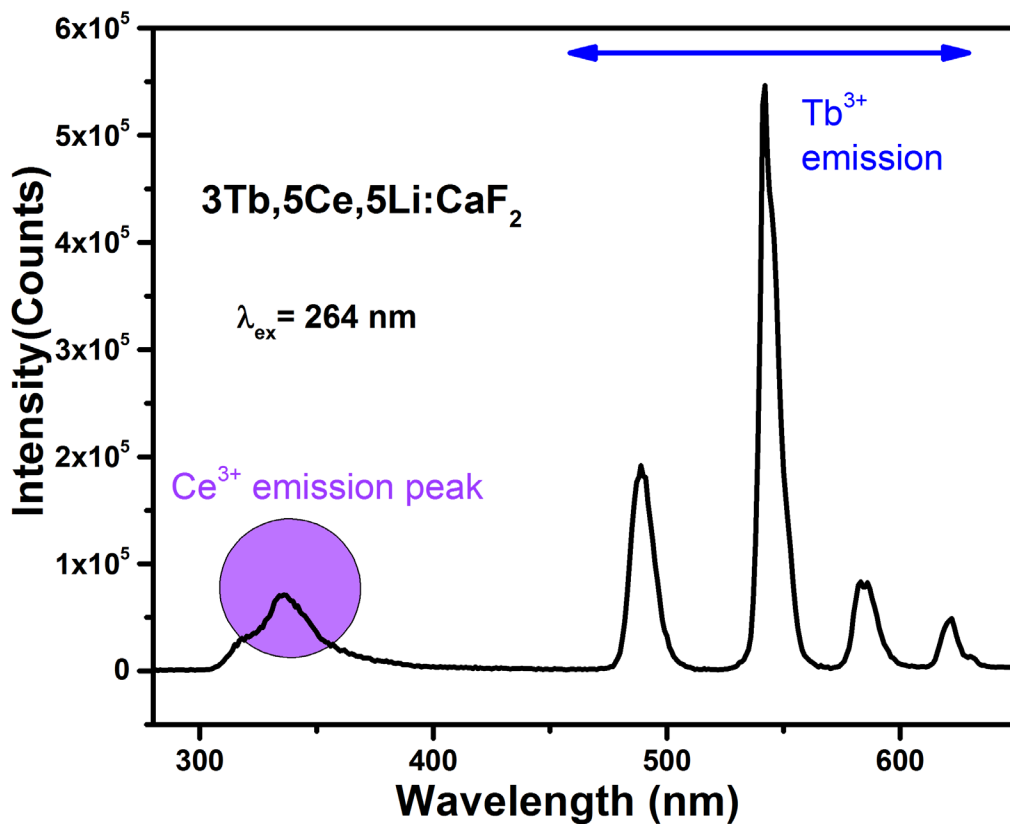

**Fig. SI 2.** Emission peak of Ce<sup>3+</sup> and Tb<sup>3+</sup> ions in 3Tb,5Ce,5Li:CaF<sub>2</sub> at excitation wavelength 264 nm. Purple Circle indicates the emission peak originated from Ce<sup>3+</sup> ions and four other peaks within blue double headed arrow are from the Tb<sup>3+</sup> ions.

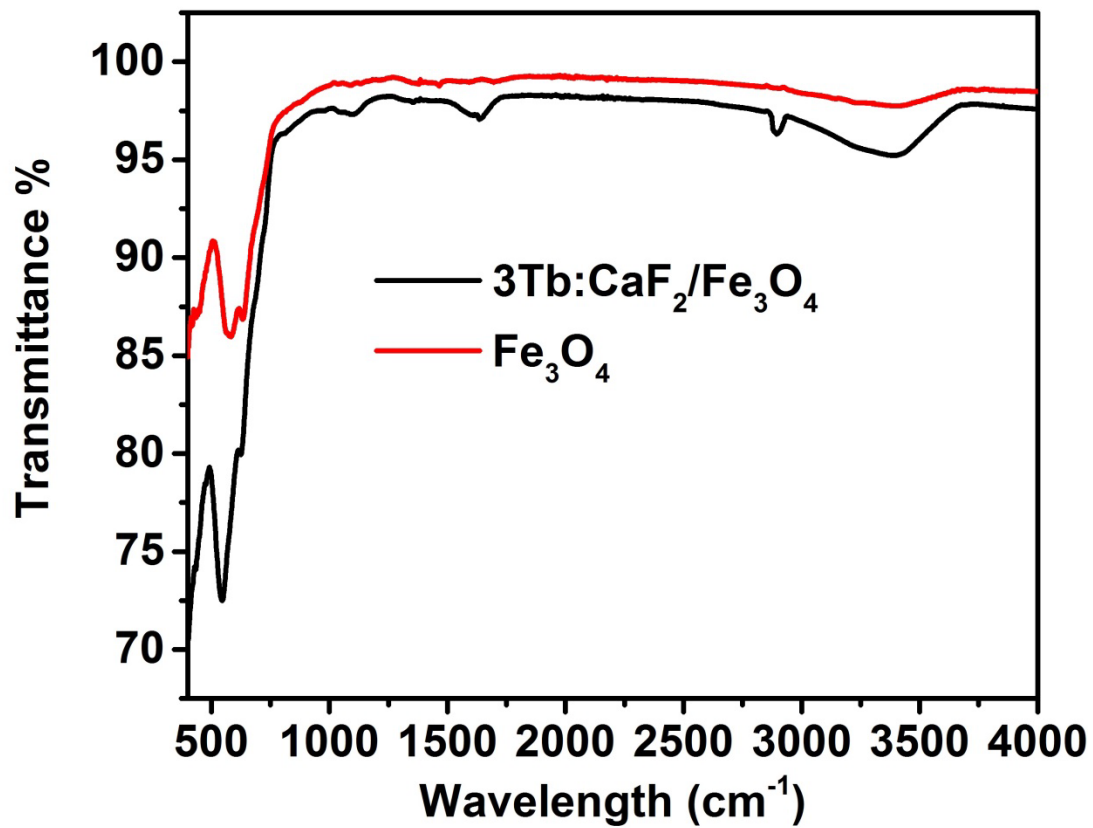

Fig. SI 3. FTIR spectra of pure Fe<sub>3</sub>O<sub>4</sub> and PEG coated 3Tb:CaF<sub>2</sub>/Fe<sub>3</sub>O<sub>4</sub> nanocomposite.
